# Supplementary material for: Epidemiology, clinical characteristics, resistance, and treatment of infections by Candida auris
Source: PubMed Central journal article supplement (PMC6206635; doi:10.1186/s40560-018-0342-4), 2018-10-29

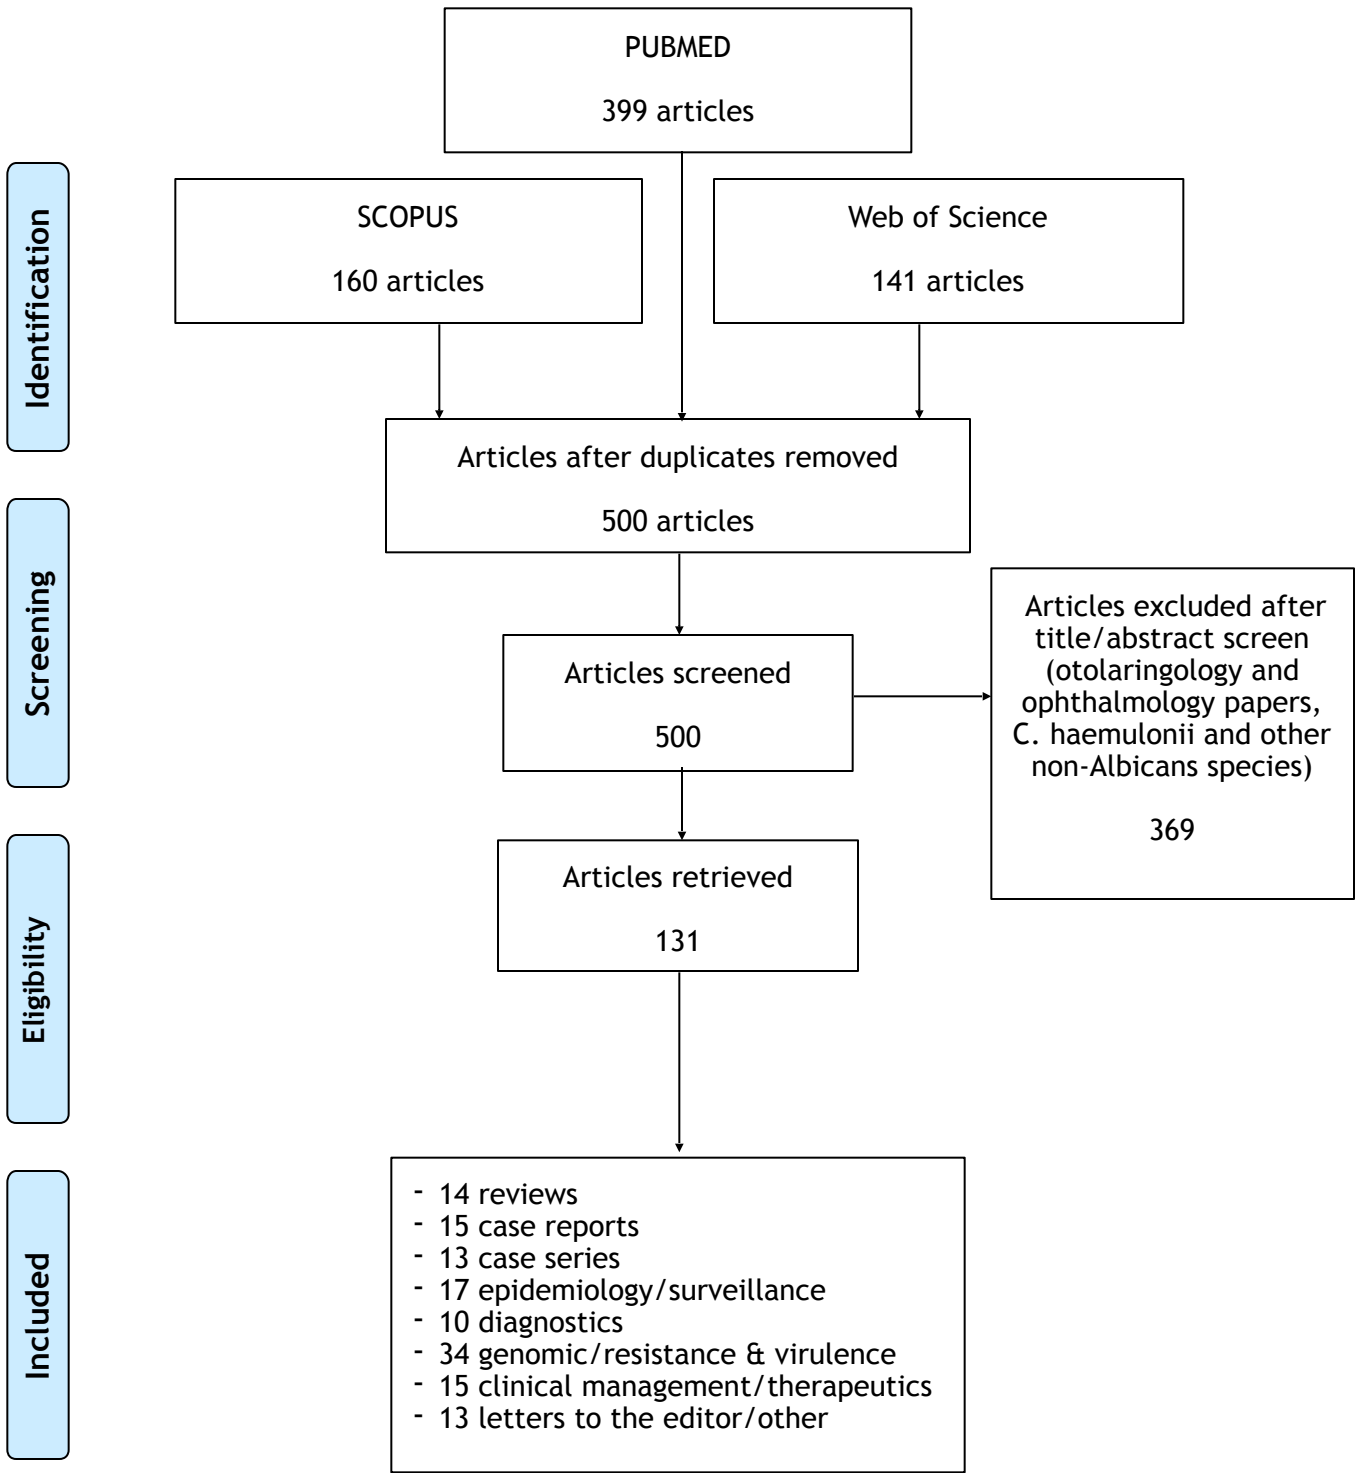

Supplement: 40560_2018_342_MOESM1_ESM.pdf [file 40560_2018_342_MOESM1_ESM.pdf]
